# Supplementary material for: The effect of accounting for public holidays on the skills of the atmospheric composition model SILAM v.5.7
Source: Copernicus journal article supplement (doi:10.5194/gmd-14-7459-2021), 2021-12-07
Supplement: Supplementary file 1 [file gmd-14-7459-2021-supplement.pdf]

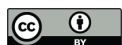

*Supplement of*

## **The effect of accounting for public holidays on the skills of the atmospheric composition model SILAM v.5.7**

**Yalda Fatahi et al.**

*Correspondence to:* Yalda Fatahi (yalda.fatahi@fmi.fi)

The copyright of individual parts of the supplement might differ from the article licence.

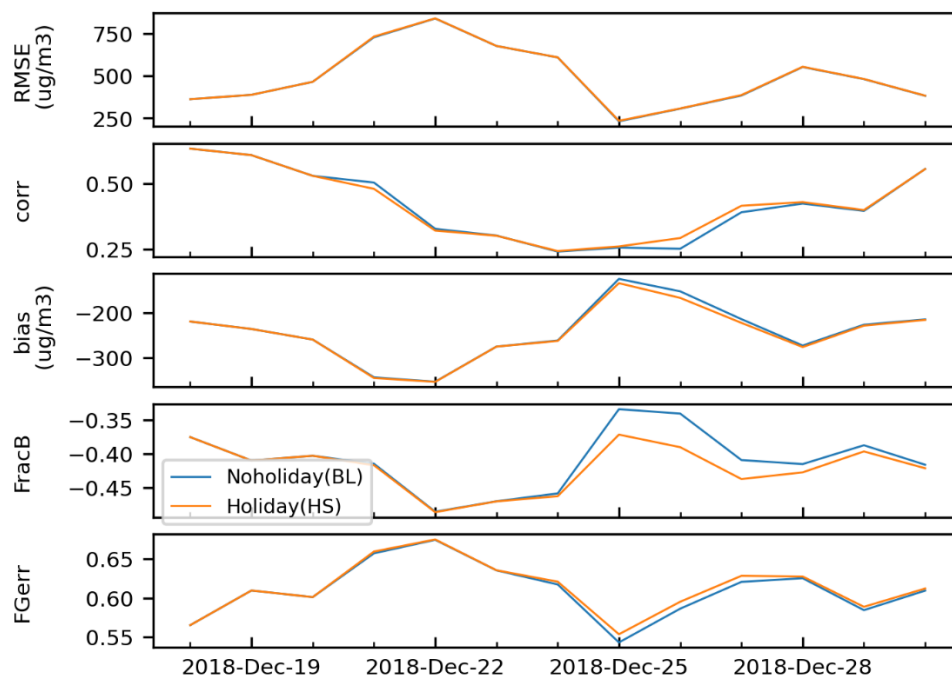

Figure S1. Spatial SILAM scores for Christmas (CO, daily mean over Europe).

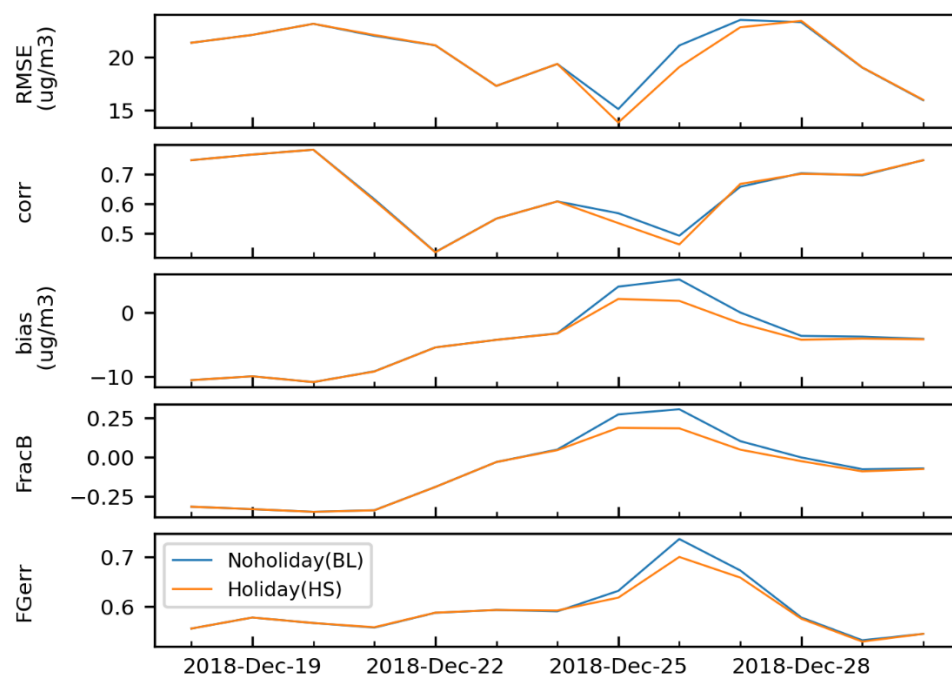

Figure S2. Spatial SILAM scores for Christmas (NO<sub>x</sub>, daily mean over Europe).

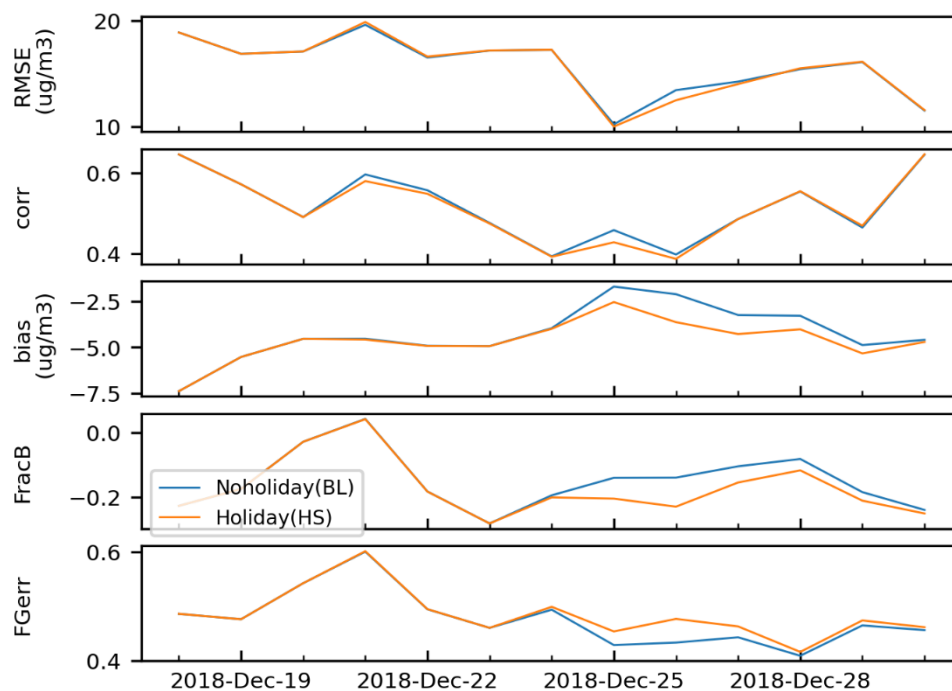

Figure S3. Spatial SILAM scores for Christmas (PM<sub>10</sub>, daily mean over Europe).

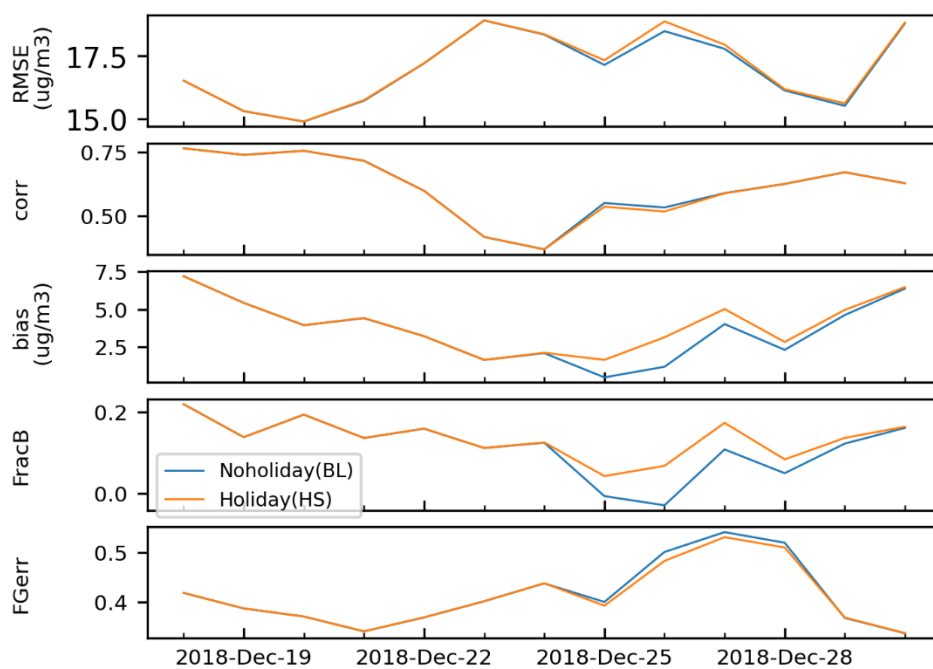

Figure S4. Spatial SILAM scores for Christmas (O<sub>3</sub>, daily mean over Europe).

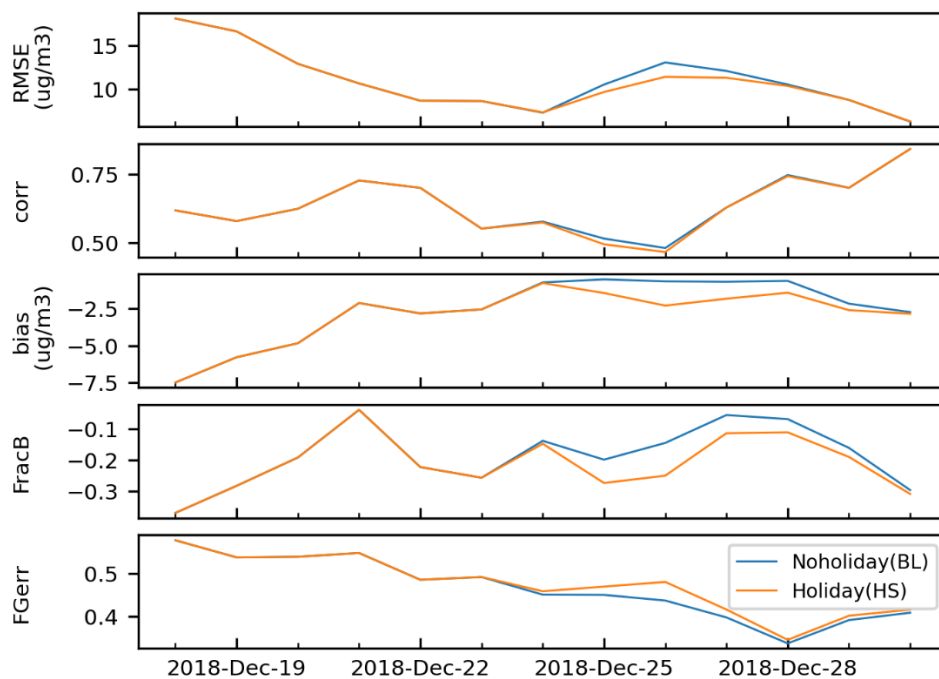

Figure S5. Spatial SILAM scores for Christmas ( $PM_{2.5}$ , daily mean over Europe).

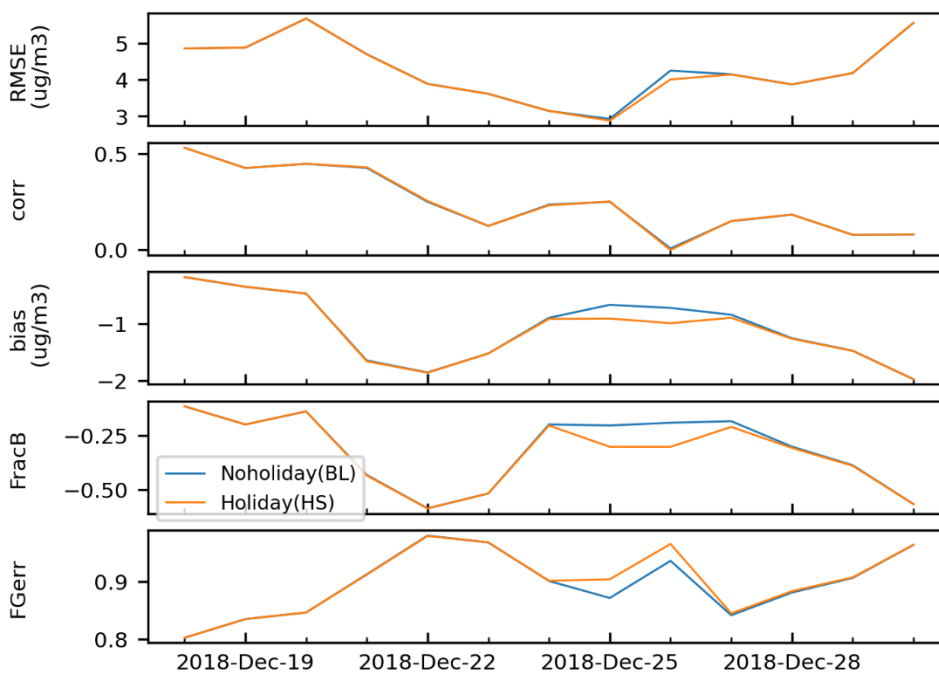

Figure S6. Spatial SILAM scores for Christmas ( $SO_2$ , daily mean over Europe).

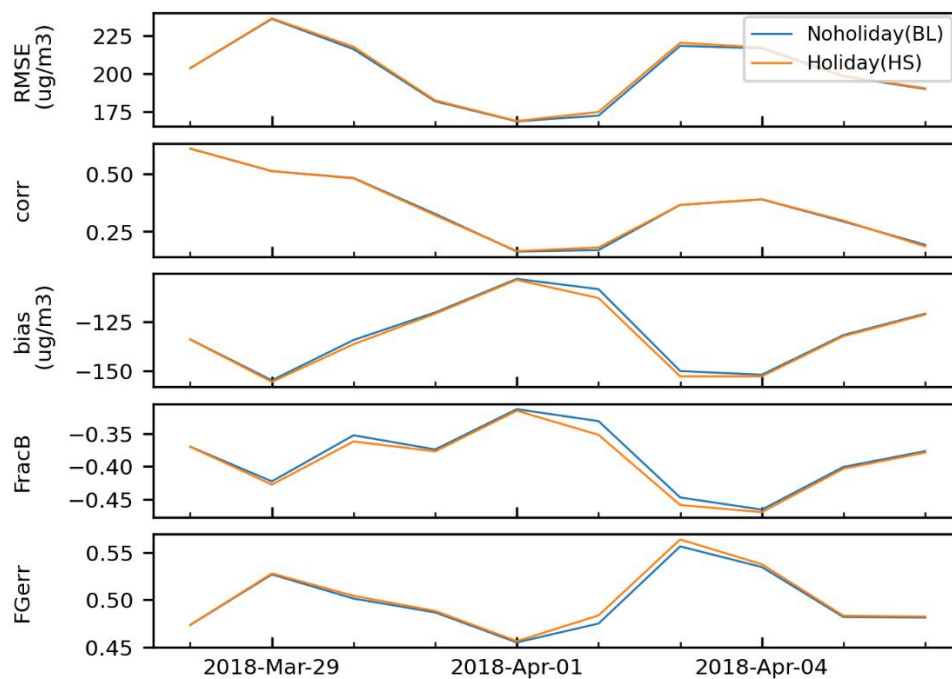

Figure S7. Spatial SILAM scores for Easter (CO, daily mean over Europe).

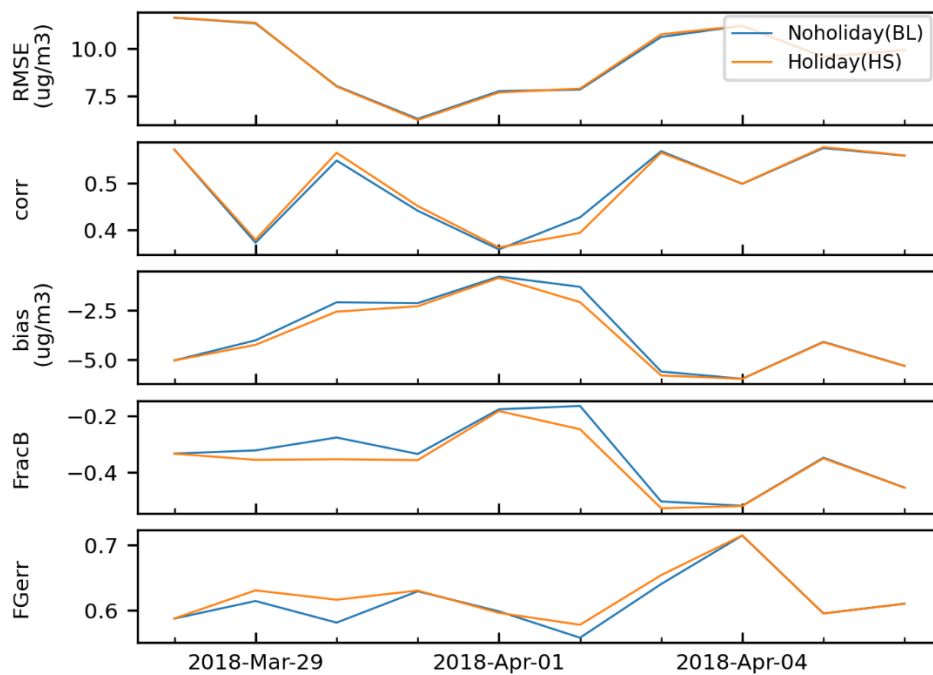

Figure S8. Spatial SILAM scores for Easter (NO<sub>x</sub>, daily mean over Europe).

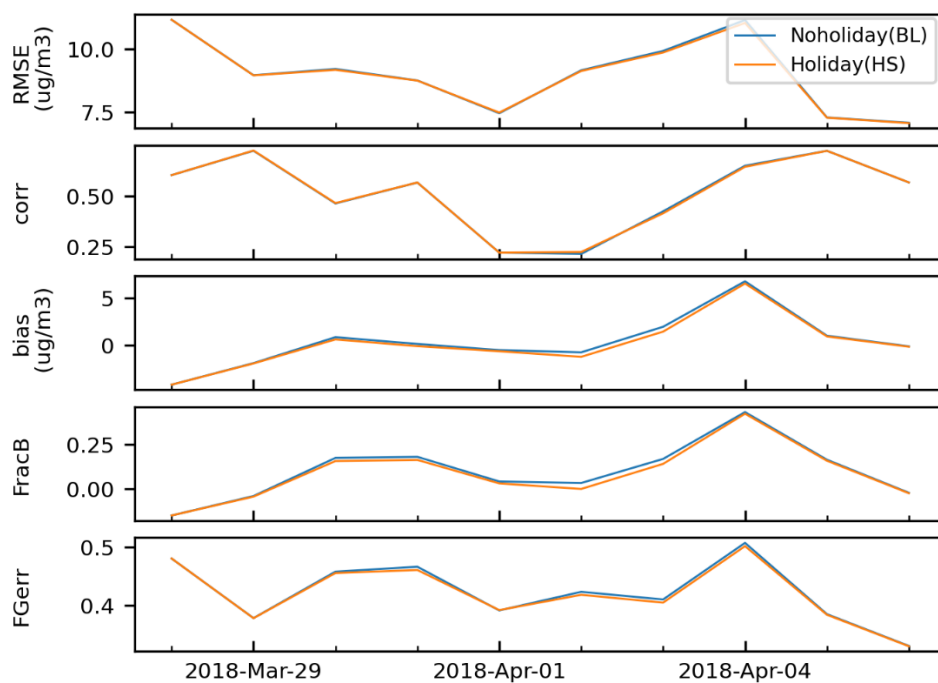

Figure S9. Spatial SILAM scores for Easter (PM<sub>10</sub>, daily mean over Europe).

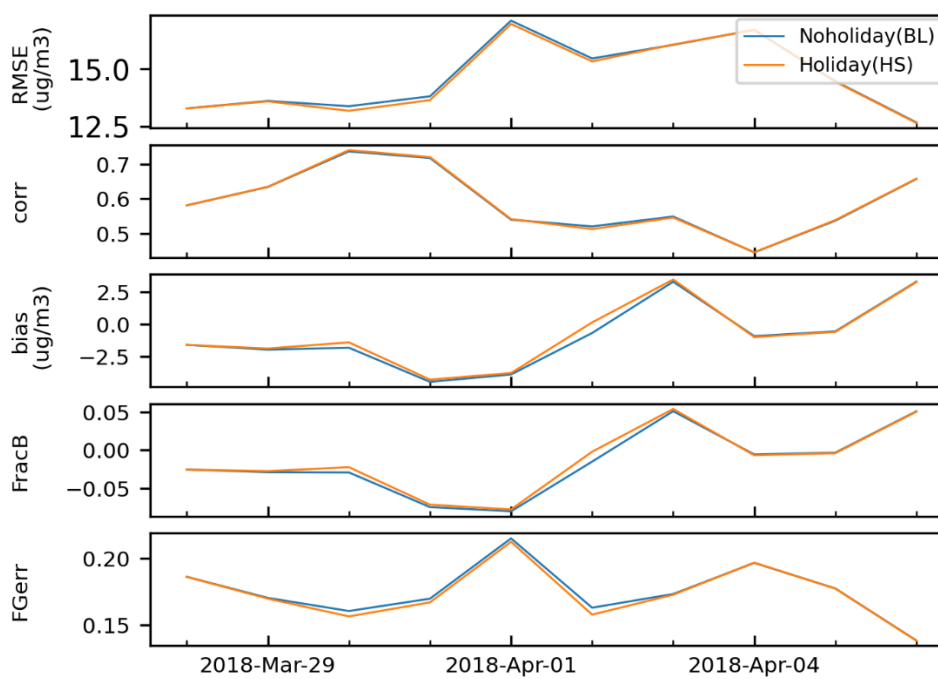

Figure S10. Spatial SILAM scores for Easter (O<sub>3</sub>, daily mean over Europe).

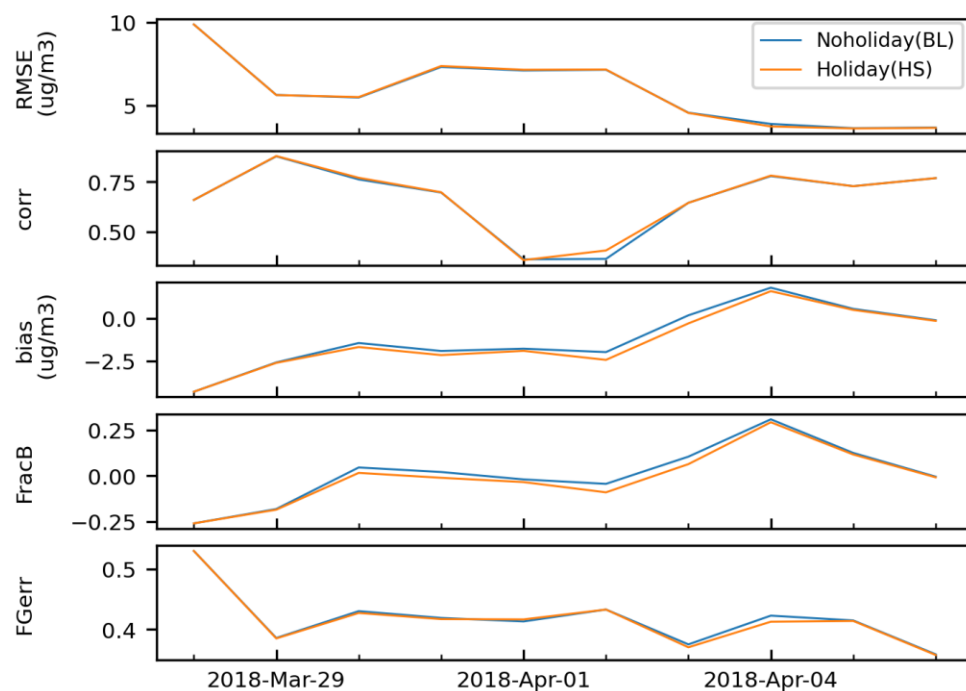

Figure S11. Spatial SILAM scores for Easter ( $PM_{2.5}$ , daily mean over Europe).

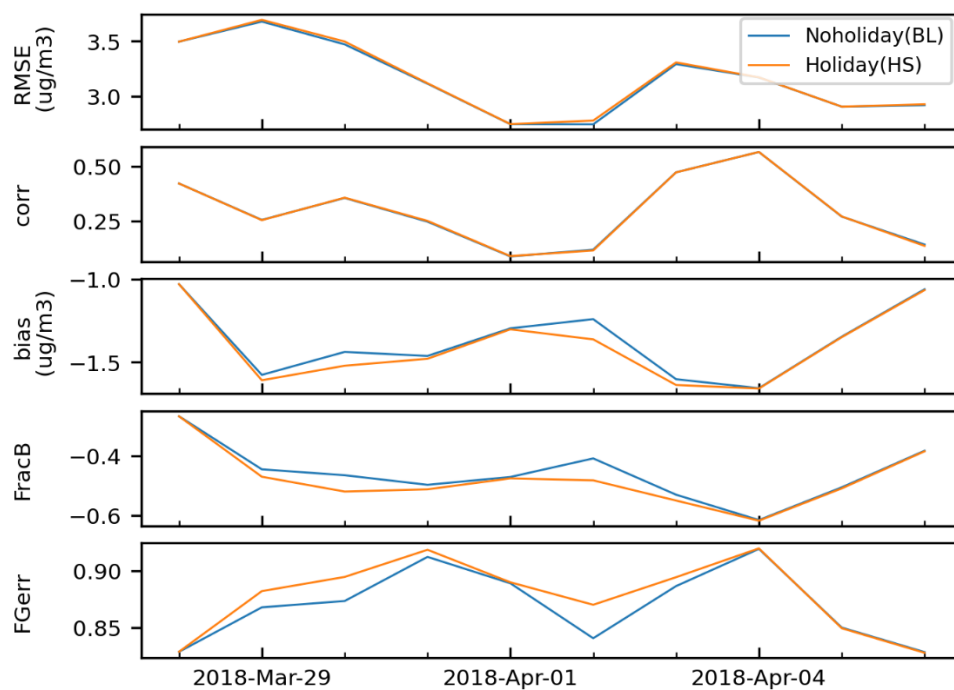

Figure S12. Spatial SILAM scores for Easter ( $SO_2$ , daily mean over Europe).

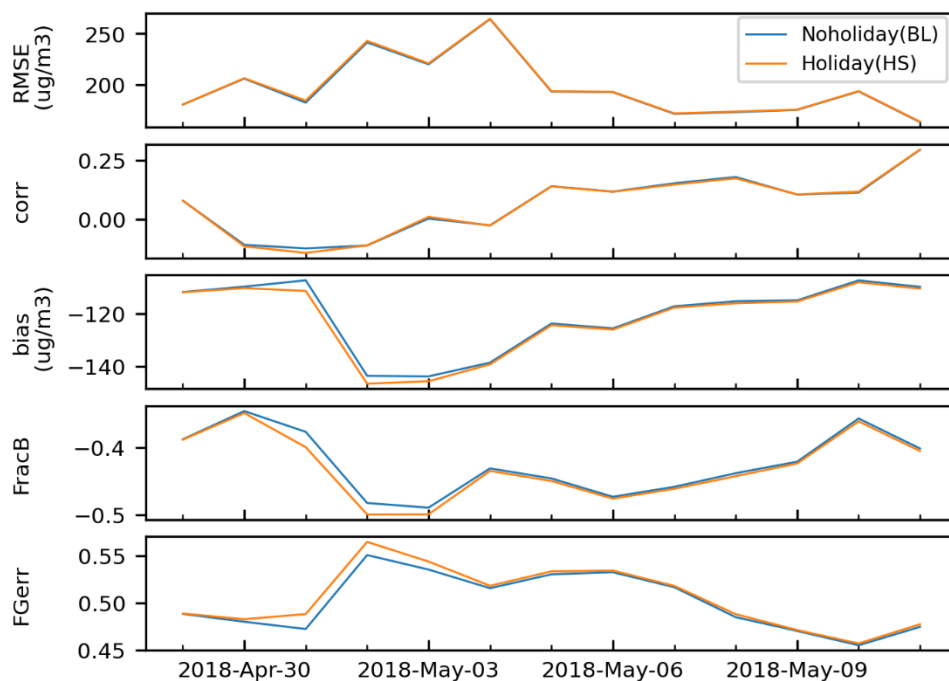

Figure S13. Spatial SILAM scores for May vacations (CO, daily mean over Europe).

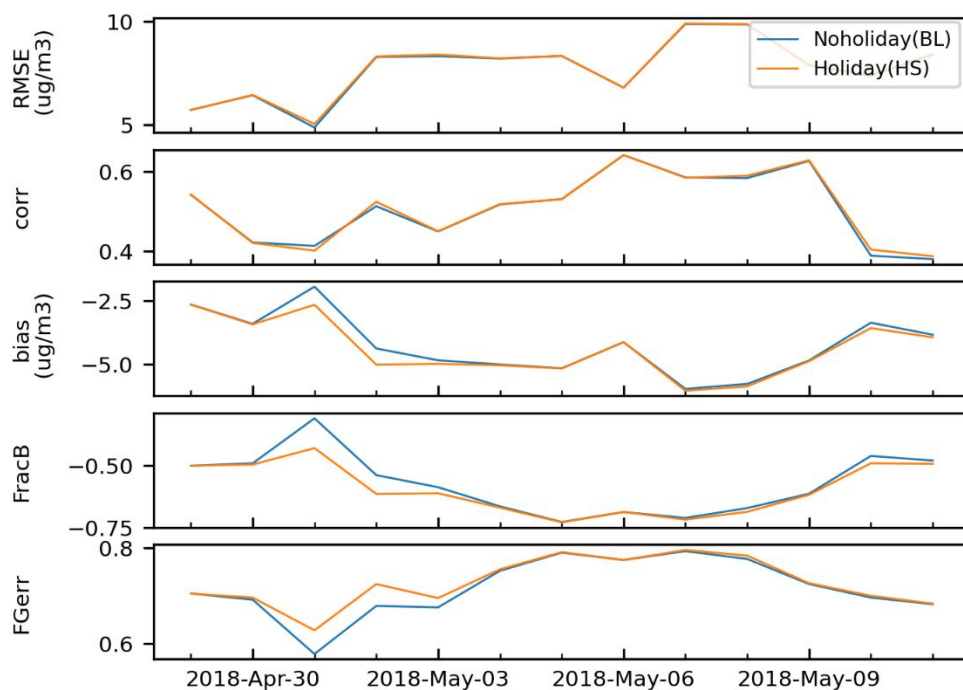

Figure S14. Spatial SILAM scores for May vacations (NO<sub>x</sub>, daily mean over Europe).



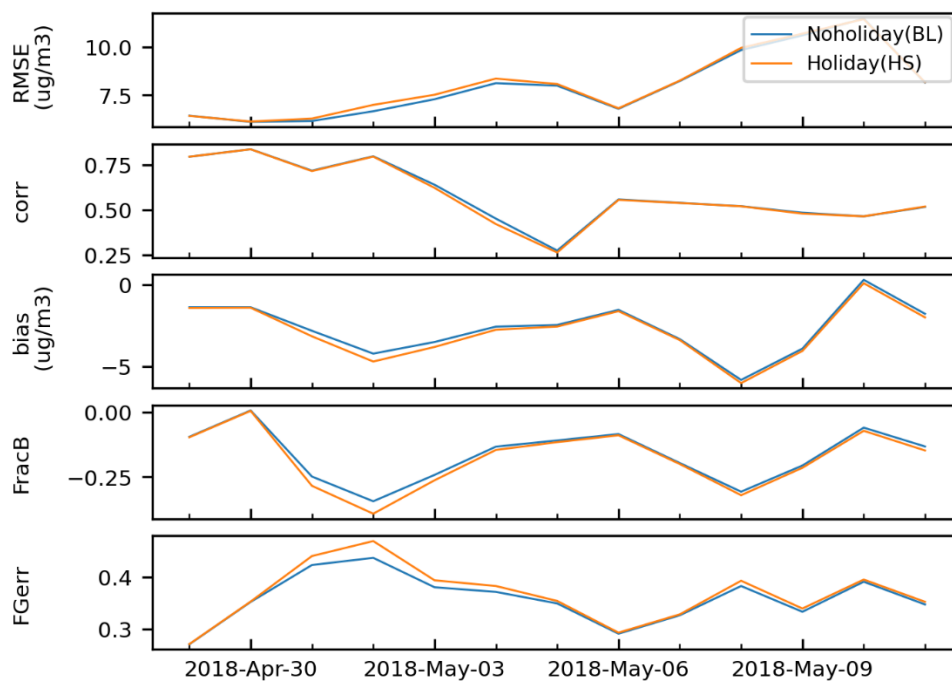

Figure S15. Spatial SILAM scores for May vacations ( $PM_{10}$ , daily mean over Europe).

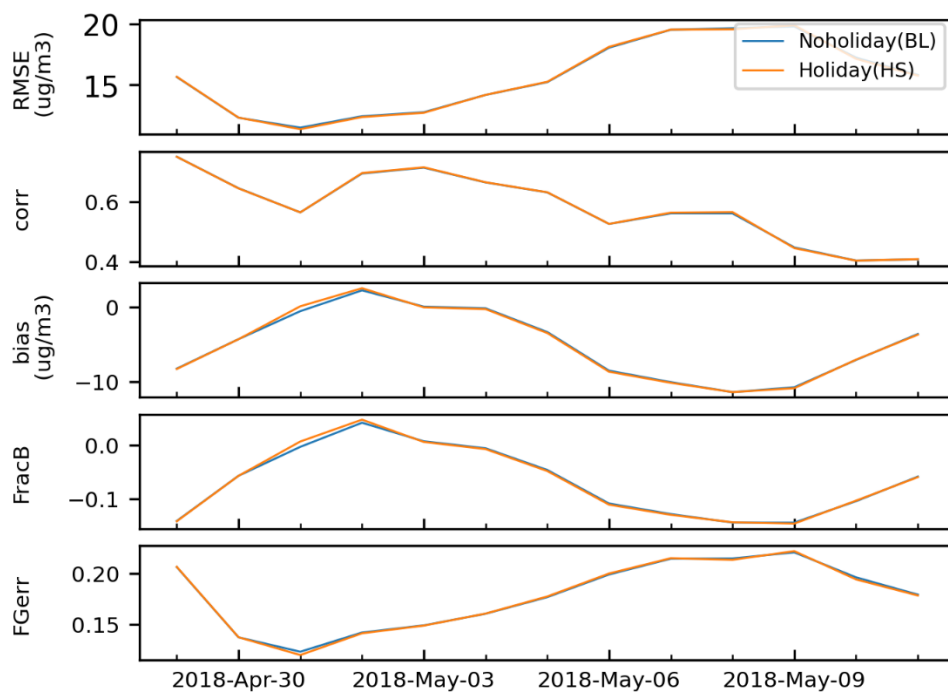

Figure S16. Spatial SILAM scores for May vacations ( $O_3$ , daily mean over Europe).

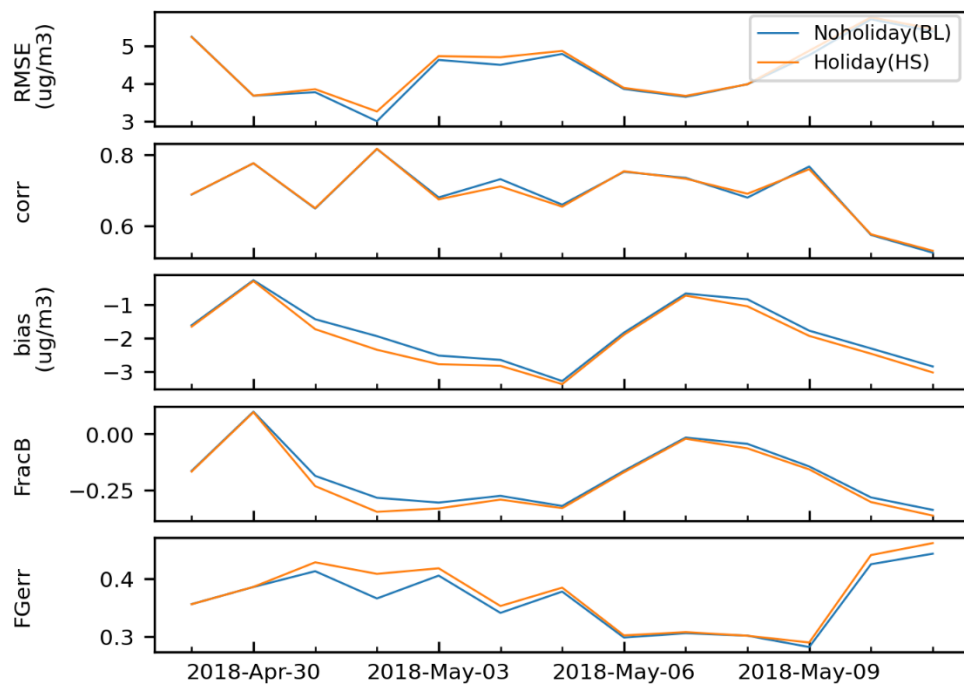

Figure S17. Spatial SILAM scores for May vacations ( $PM_{2.5}$ , daily mean over Europe).

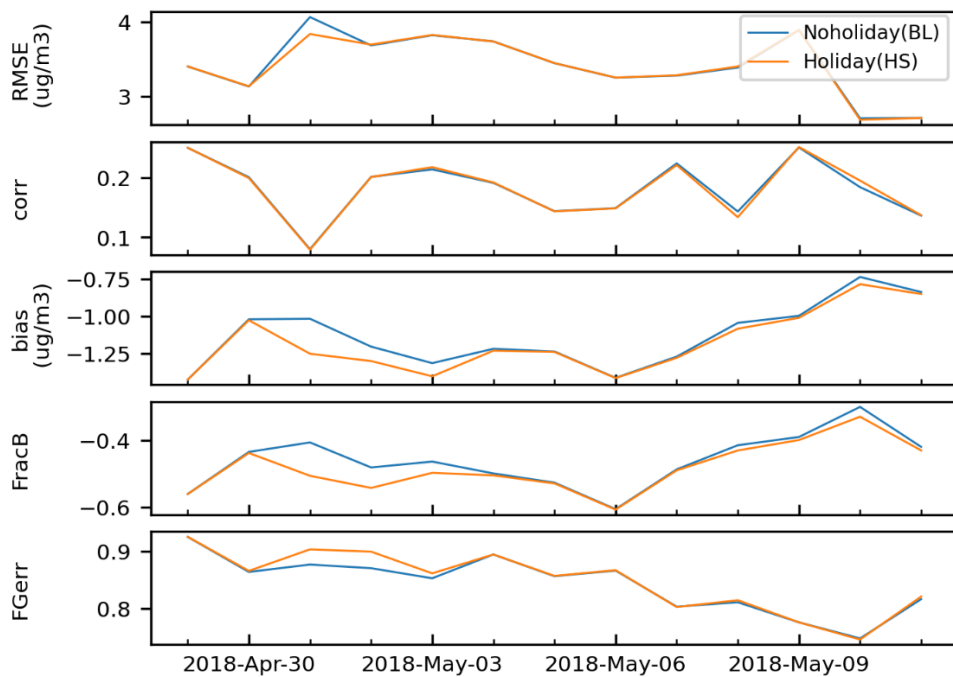

Figure S18. Spatial SILAM scores for May vacations ( $SO_2$ , daily mean over Europe).

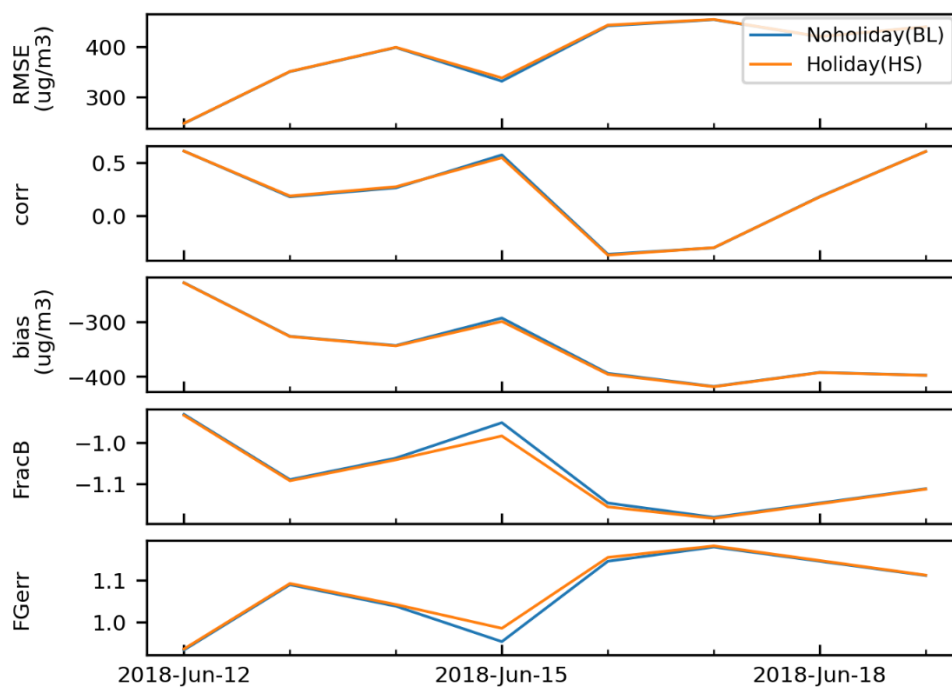

Figure S19. Spatial SILAM scores for Ramadan (CO, daily mean over Turkey).

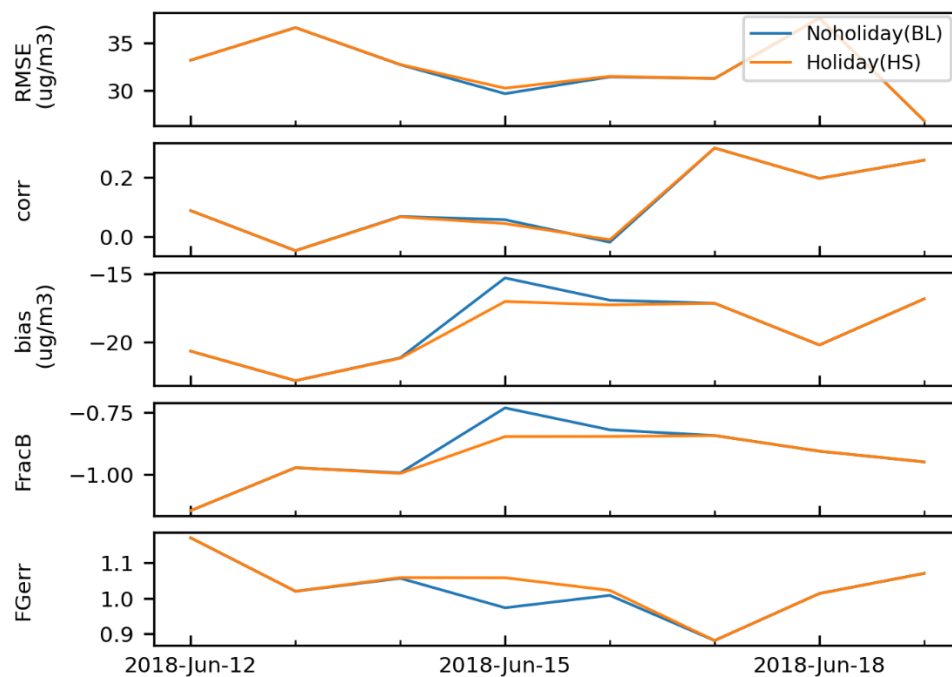

Figure S20. Spatial SILAM scores for Ramadan (NO<sub>x</sub>, daily mean over Turkey).

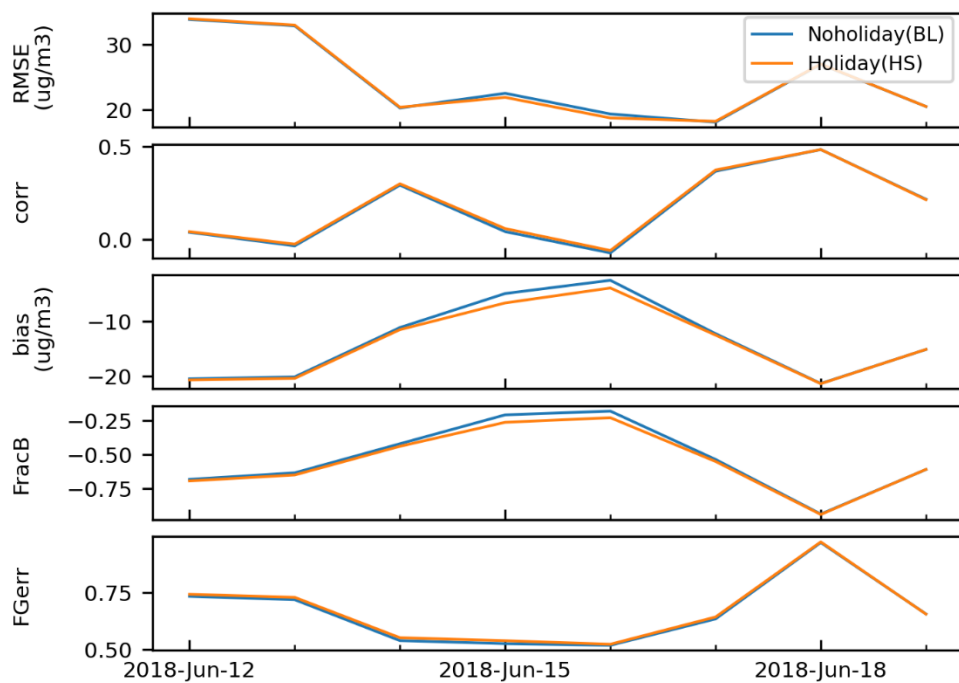

Figure S21. Spatial SILAM scores for Ramadan (PM<sub>10</sub>, daily mean over Turkey).

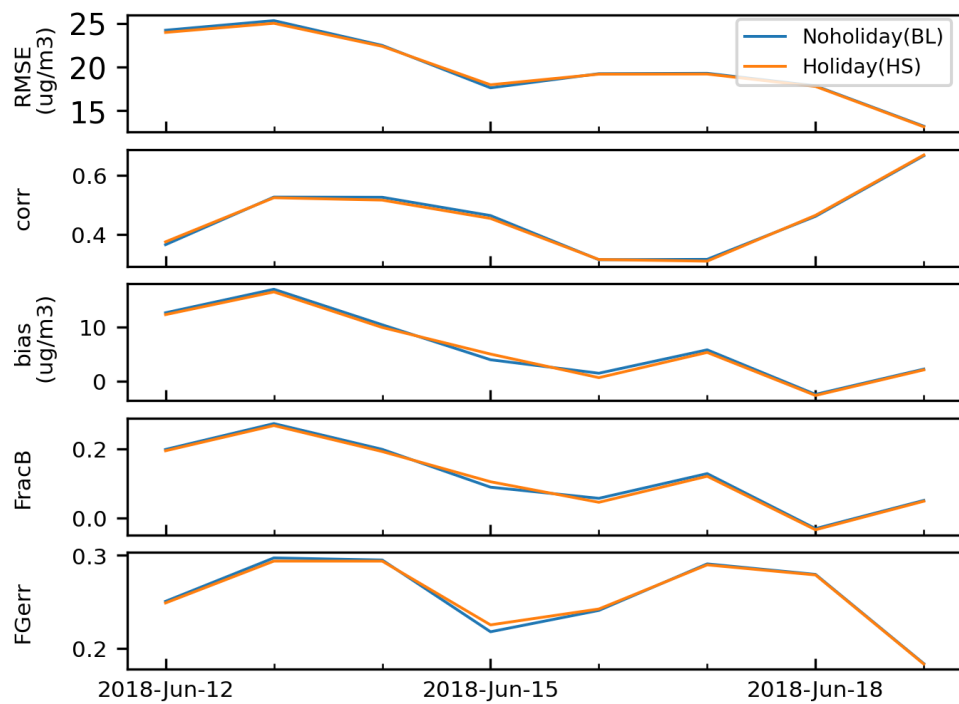

Figure S22. Spatial SILAM scores for Ramadan (O<sub>3</sub>, daily mean over Turkey).

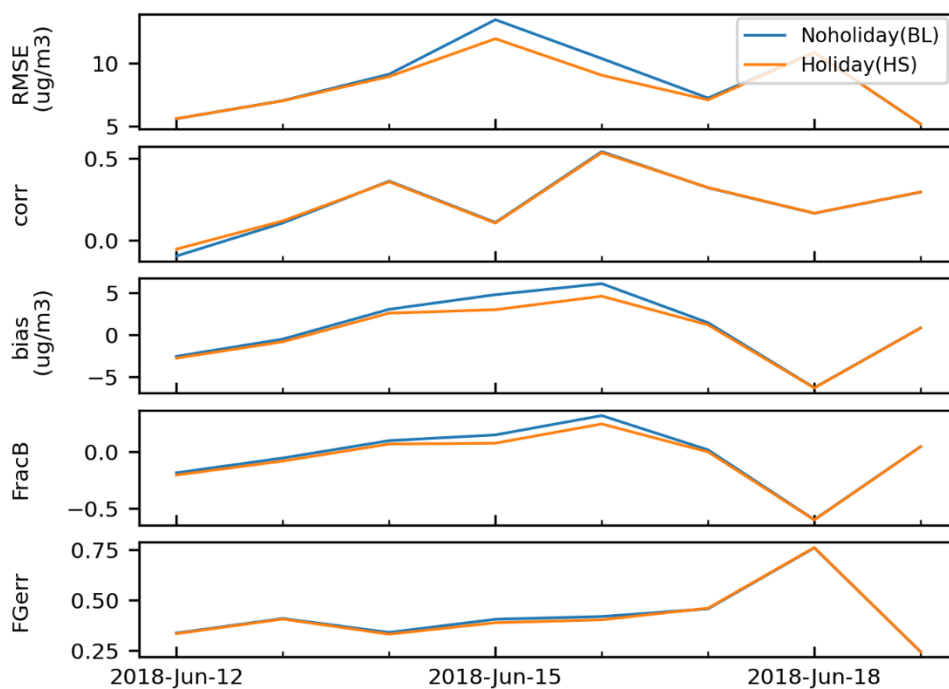

Figure S23. Spatial SILAM scores for Ramadan (PM<sub>2.5</sub>, daily mean over Turkey).

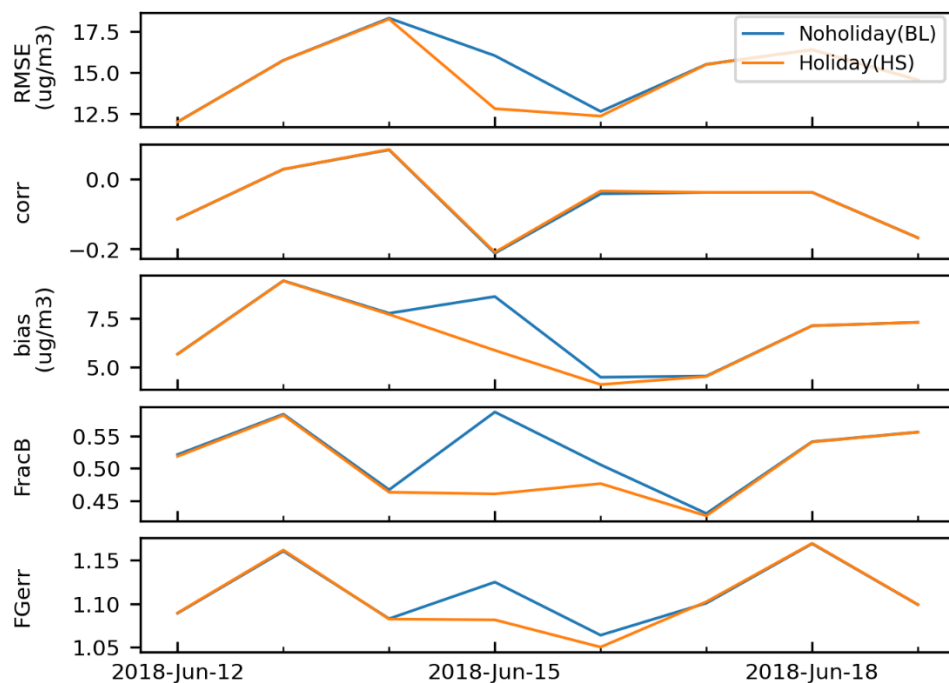

Figure S24. Spatial SILAM scores for Ramadan (SO<sub>2</sub>, daily mean over Turkey).
